# Supplementary material
Source: PubMed Central journal article supplement (PMC7006227)
Supplement: NIHMS1067692-supplement-suppl.pdf [file NIHMS1067692-supplement-suppl.pdf]

Figure 1: Selection of Study Population

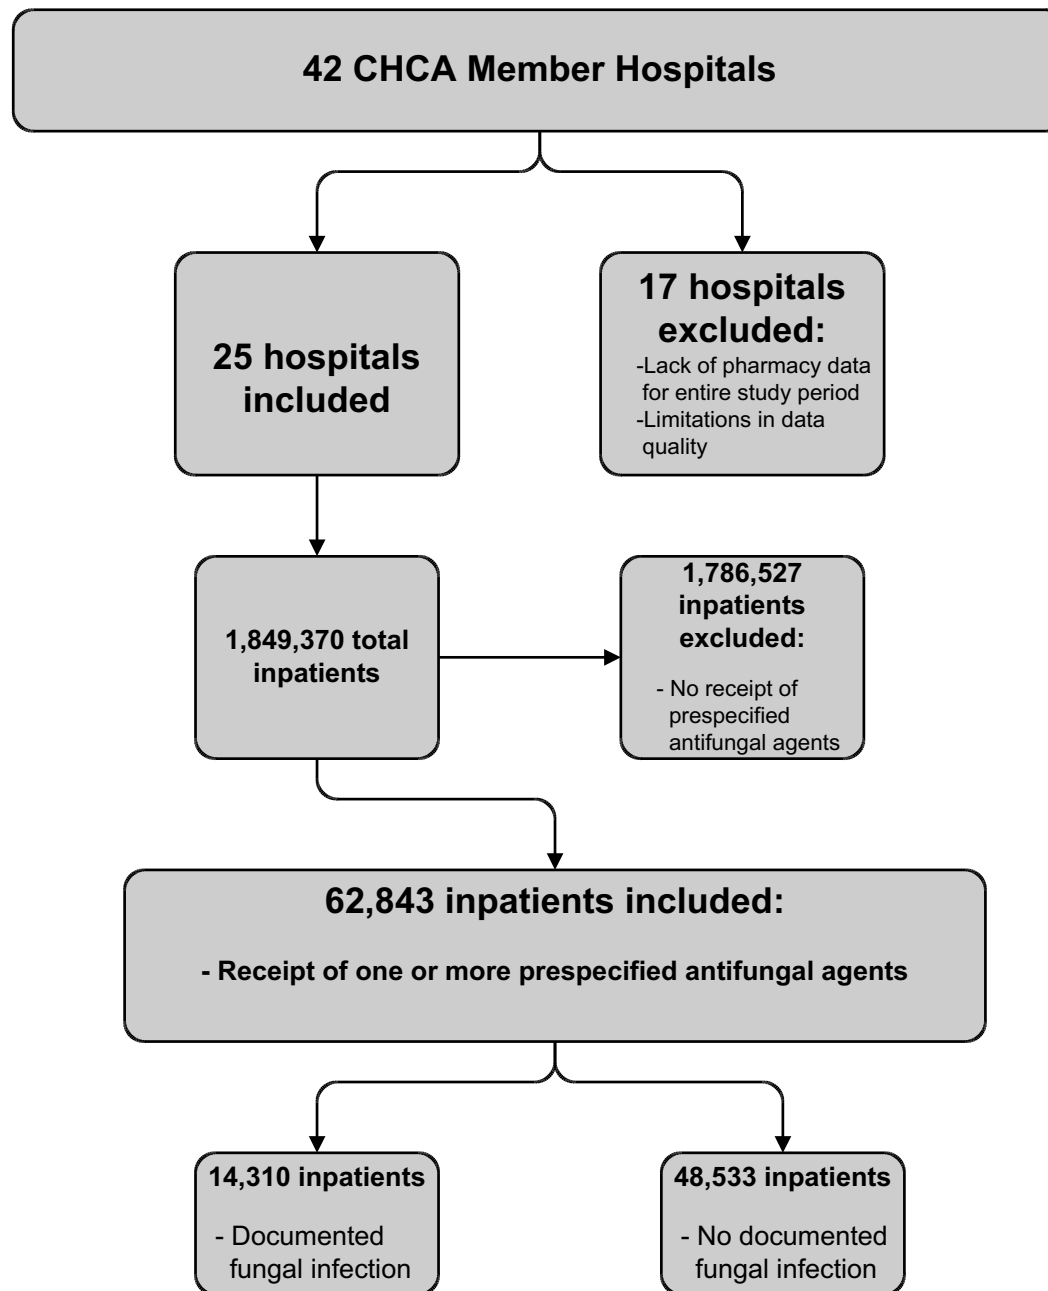

Appendix A: Profile of ICD-9-CM Codes Used to Designate Fungal Infection Status

| <b>Aspergillosis</b>                                                       |                                                                          |
|----------------------------------------------------------------------------|--------------------------------------------------------------------------|
| <b>ICD-9-CM Code</b>                                                       | <b>Description</b>                                                       |
| 117.3                                                                      | Aspergillosis                                                            |
| <b>Disseminated/Systemic Candidiasis</b>                                   |                                                                          |
| <b>ICD-9-CM Code</b>                                                       | <b>Description</b>                                                       |
| 112.4                                                                      | Candidiasis of lung                                                      |
| 112.5                                                                      | Disseminated candidiasis                                                 |
| 112.81                                                                     | Candidal endocarditis                                                    |
| 112.83                                                                     | Candidal meningitis                                                      |
| <b>Mucosal/Superficial Candidiasis</b>                                     |                                                                          |
| <b>ICD-9-CM Code</b>                                                       | <b>Description</b>                                                       |
| 112.0                                                                      | Candidiasis of mouth                                                     |
| 112.1                                                                      | Candidiasis of vulva and vagina                                          |
| 112.2                                                                      | Candidiasis of other urogenital sites                                    |
| 112.3                                                                      | Candidiasis of skin and nails                                            |
| 112.82                                                                     | Candidal otitis externa                                                  |
| 112.84                                                                     | Candidiasis of the esophagus                                             |
| 112.85                                                                     | Candidiasis of the intestine                                             |
| 112.9                                                                      | Candidiasis of unspecified site                                          |
| <b>Endemic Mycoses (Coccidioidomycosis, Histoplasmosis, Blastomycosis)</b> |                                                                          |
| <b>ICD-9-CM Code</b>                                                       | <b>Description</b>                                                       |
| 114.0                                                                      | Primary coccidioidomycosis (pulmonary)                                   |
| 114.1                                                                      | Primary extrapulmonary coccidioidomycosis                                |
| 114.2                                                                      | Coccidioidal meningitis                                                  |
| 114.3                                                                      | Other forms of progressive coccidioidomycosis                            |
| 114.4                                                                      | Chronic pulmonary coccidioidomycosis                                     |
| 114.5                                                                      | Pulmonary coccidioidomycosis, unspecified                                |
| 114.9                                                                      | Coccidioidomycosis, unspecified                                          |
| 115.00                                                                     | Infection by histoplasma capsulatum, without mention of manifestation    |
| 115.01                                                                     | Histoplasma capsulatum meningitis                                        |
| 115.02                                                                     | Histoplasma capsulatum retinitis                                         |
| 115.03                                                                     | Histoplasma capsulatum pericarditis                                      |
| 115.04                                                                     | Histoplasma capsulatum endocarditis                                      |
| 115.05                                                                     | Histoplasma capsulatum pneumonia                                         |
| 115.09                                                                     | Infection by histoplasma capsulatum, with mention of other manifestation |
| 115.10                                                                     | Infection by histoplasma duboisii, without mention of manifestation      |
| 115.11                                                                     | Histoplasma duboisii meningitis                                          |
| 115.12                                                                     | Histoplasma duboisii retinitis                                           |
| 115.13                                                                     | Histoplasma duboisii pericarditis                                        |
| 115.14                                                                     | Histoplasma duboisii endocarditis                                        |
| 115.15                                                                     | Histoplasma duboisii pneumonia                                           |
| 115.19                                                                     | Infection by histoplasma duboisii with mention of other manifestation    |
| 115.90                                                                     | Histoplasmosis, unspecified without mention of manifestation             |
| 115.91                                                                     | Histoplasmosis meningitis                                                |
| 115.92                                                                     | Histoplasmosis retinitis                                                 |
| 115.93                                                                     | Histoplasmosis pericarditis                                              |

|                      |                                                                 |
|----------------------|-----------------------------------------------------------------|
| 115.94               | Histoplasmosis endocarditis                                     |
| 115.95               | Histoplasmosis pneumonia                                        |
| 115.99               | Histoplasmosis, unspecified with mention of other manifestation |
| 116.0                | Blastomycosis                                                   |
| 116.1                | Paracoccidioidomycosis                                          |
| <b>Zygomycosis</b>   |                                                                 |
| <b>ICD-9-CM Code</b> | <b>Description</b>                                              |
| 117.7                | Zygomycosis (phycomycosis or mucormycosis)                      |
